# Supplementary material for: New trends in tourist consumption. Typology of Spanish tourists.
Source: MDPI journal article supplement (doi:10.3390/geriatrics7060133), 2009-01-01
Supplement: s1 [file s1]

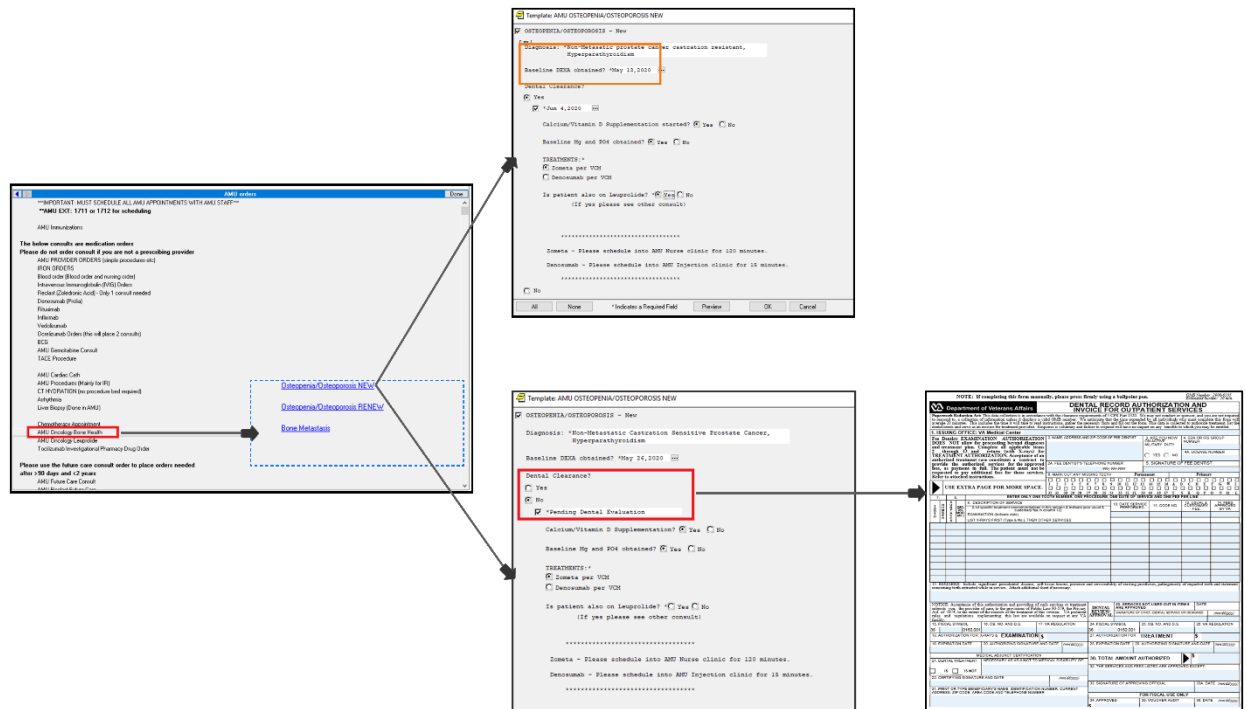

Supp. Figure S1. Algorithm explaining the steps while prescribing BMA in case of prostate cancer with new diagnosis of osteopenia/osteoporosis.

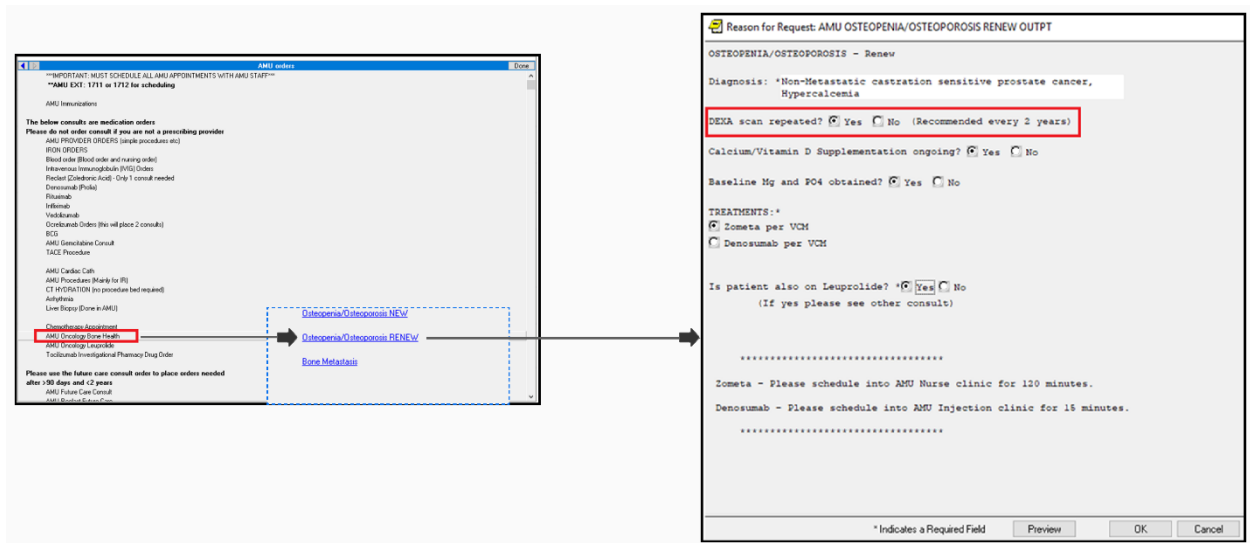

Supp. Figure S2. Algorithm explaining the steps while renewing the prescription of BMA in case of prostate cancer with known diagnosis of osteopenia/osteoporosis.

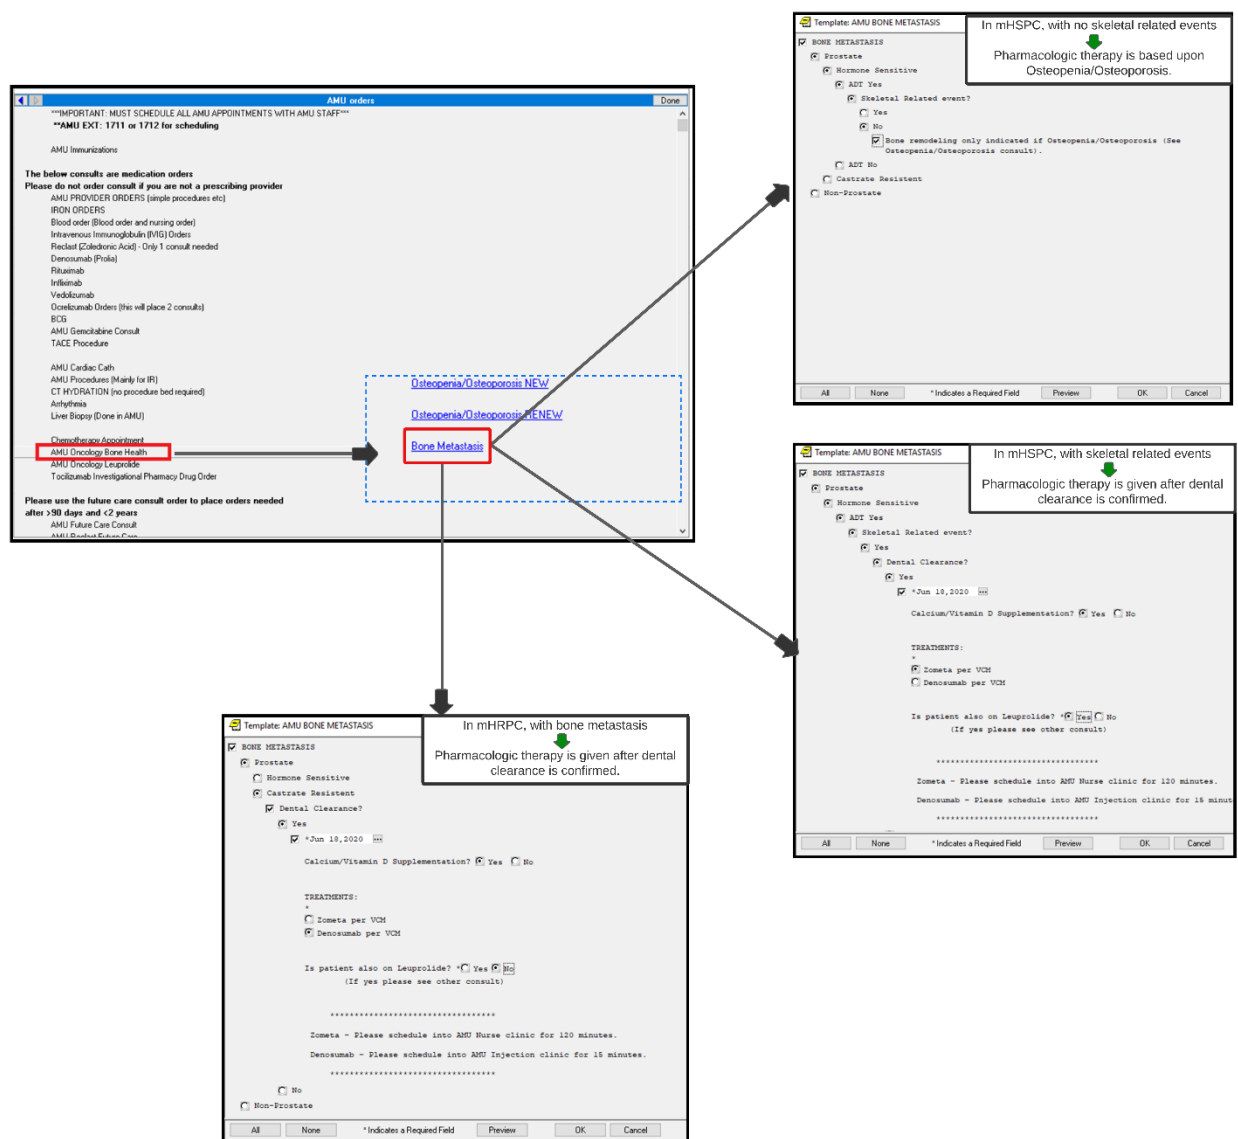

**Supp. Figure S3.** Algorithm explaining the steps while prescribing BMA in case of prostate cancer with bone metastasis.
